# Supplementary material for: Dramatically Enhanced Mechanical Properties of Nano-TiN-Dispersed n-Type Bismuth Telluride by Multi-Effect Modulation
Source: MDPI journal article supplement (doi:10.3390/ma17081919), 2024-04-22
Supplement: s1 [file s1]

# Supplementary Information

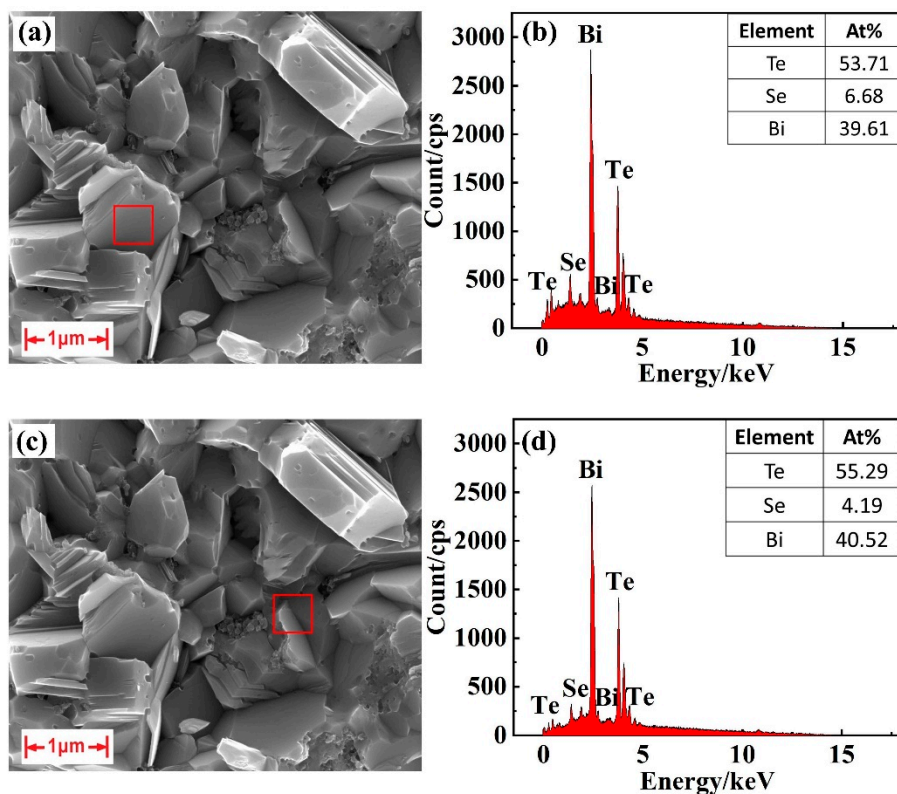

**Figure S1.** (a,c)SEM images for fractured surface of the the  $\text{Bi}_2\text{Te}_{2.7}\text{Se}_{0.3} + 0.7\% \text{TiN}$  sample, (b) EDS of selected region in (a,d) EDS of selected region in (c).

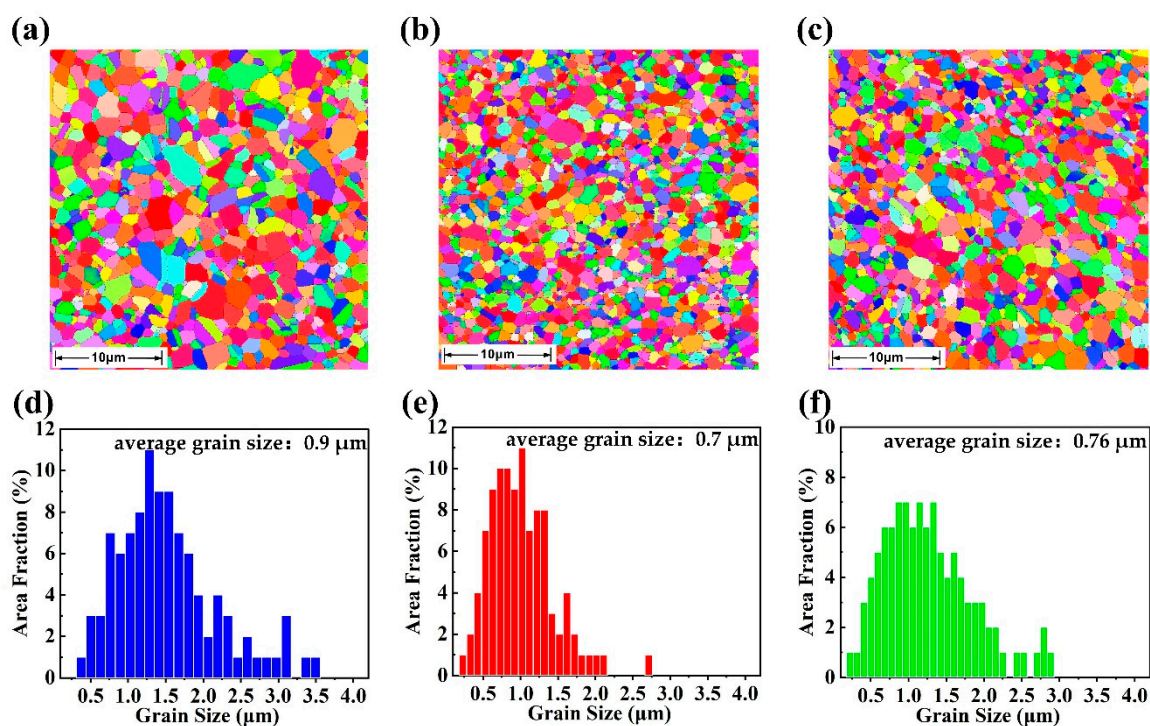

**Figure S2.** EBSD images of the  $\text{Bi}_2\text{Te}_{2.7}\text{Se}_{0.3} + x \text{ wt.\% TiN}$  samples with a)  $x = 0\%$ , b)  $x = 0.7\%$  and c)  $x = 1\%$ , and the corresponding grain size distributions for the samples with d)  $x = 0\%$ , e)  $x = 0.7\%$  and f)  $x = 1\%$ .

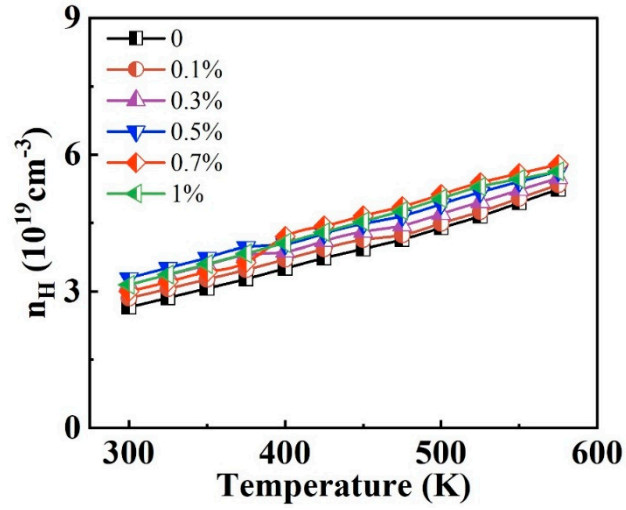

**Figure S3.** Temperature-dependent carrier concentrations of the  $\text{Bi}_2\text{Te}_{2.7}\text{Se}_{0.3} + x$  wt.% TiN samples.

**Table S1.** Vickers hardness of the  $\text{Bi}_2\text{Te}_{2.7}\text{Se}_{0.3} + x$  wt.% TiN samples

| x wt.% TiN | Test | Vickers Hardness(GPa) | Average Value(GPa) | Standard Deviation(GPa) |
|------------|------|-----------------------|--------------------|-------------------------|
| 0          | 1    | 0.806                 | 0.816              | 0.0213                  |
|            | 2    | 0.841                 |                    |                         |
|            | 3    | 0.802                 |                    |                         |
| 0.1        | 1    | 0.831                 | 0.841              | 0.0381                  |
|            | 2    | 0.883                 |                    |                         |
|            | 3    | 0.809                 |                    |                         |
| 0.3        | 1    | 0.864                 | 0.874              | 0.0396                  |
|            | 2    | 0.917                 |                    |                         |
|            | 3    | 0.841                 |                    |                         |
| 0.5        | 1    | 0.872                 | 0.882              | 0.0574                  |
|            | 2    | 0.944                 |                    |                         |
|            | 3    | 0.831                 |                    |                         |
| 0.7        | 1    | 0.973                 | 0.983              | 0.0259                  |
|            | 2    | 1.012                 |                    |                         |
|            | 3    | 0.963                 |                    |                         |
| 1          | 1    | 0.916                 | 0.926              | 0.0226                  |
|            | 2    | 0.952                 |                    |                         |
|            | 3    | 0.911                 |                    |                         |

**Table S2.** Bending strength of the  $\text{Bi}_2\text{Te}_{2.7}\text{Se}_{0.3}$  and  $\text{Bi}_2\text{Te}_{2.7}\text{Se}_{0.3} + 0.7\%$  TiN samples

| x wt.% TiN | Test | Bending Strength(MPa) | Average Value(MPa) | Standard Deviation(MPa) |
|------------|------|-----------------------|--------------------|-------------------------|
| 0          | 1    | 22.08                 | 22.73              | 2.46                    |
|            | 2    | 25.45                 |                    |                         |
|            | 3    | 20.65                 |                    |                         |
| 0.7        | 1    | 37.62                 | 36.19              | 1.71                    |
|            | 2    | 34.31                 |                    |                         |
|            | 3    | 36.64                 |                    |                         |

**Table S3.** Compressive strength of the  $\text{Bi}_2\text{Te}_{2.7}\text{Se}_{0.3}$  and  $\text{Bi}_2\text{Te}_{2.7}\text{Se}_{0.3} + 0.7\%$  TiN samples

| x wt.% TiN | Test | Compressive Strength(MPa) | Average Value(MPa) | Standard Deviation(MPa) |
|------------|------|---------------------------|--------------------|-------------------------|
| 0          | 1    | 40.78                     | 44.13              | 4.19                    |
|            | 2    | 48.83                     |                    |                         |
|            | 3    | 42.79                     |                    |                         |
| 0.7        | 1    | 74.74                     | 74.48              | 1.61                    |
|            | 2    | 75.95                     |                    |                         |
|            | 3    | 72.76                     |                    |                         |
